# Supplementary material for: Synthesis, self-assembly, bacterial and fungal toxicity, and preliminary biodegradation studies of a series ofl-phenylalanine-derived surface-active ionic liquids
Source: Royal Society of Chemistry journal article supplement (doi:10.1039/c9gc00030e), 2019-01-01
Supplement: c9gc00030e2.zip [file c9gc00030e2.zip]

## Sheet: PheC2 (Zero Pass)
	Supplementary Information: Appendix 2				Summary of Zero Pass Metrics Toolkit
	Yield, conversion, selectivity, AE, RME
	Reactant (Limiting Reactant First)	Mass (g)	MW	Mol	Catalyst	Mass (g)	Reagent	Mass (g)	Reaction solvent	Volume (cm3)	Density (g ml-1)	Mass (g)	Work up chemical	Mass (g)	Workup solvent	Volume (cm3)	Density (g ml-1)	Mass (g)
	L-Phenylalanine	10	165.19	0.0605364			SOCl2	14.41	EtOH	36.5	0.789	28.7985	Na2CO3	10	water	250	1	250
	EtOH	2.76	46.07	0.0599088								0			ethyl acetate	150	0.894	134.1
				#DIV/0!								0						0
				#DIV/0!								0						0
				#DIV/0!								0						0
				#DIV/0!								0						0
				#DIV/0!								0						0
	Total	12.76	211.26			0		14.41				28.7985		10				384.1
									Flag
							Yield	97.0197	97.0197
							Conversion	100	100
							Selectivity	97.0197	97.0197					mass	mw	mol
							AE	91.475					Product	11.35	193.25	0.0587322
							RME	88.9498						mass
													Unreacted limiting reactant
	Solvents (Zero Pass)
	Highly hazardous solvents (Red flag for any of the following)							List Highly Hazardous Solvents Below
	Et2O, Benzene, CCl4, chloroform, DCE, nitromethane, CS2, HMPA
	Health and Safety (Zero Pass)
	Health & safety (Red flag for any of the following)						List substances plus the red flagged H-codes below
	Highly explosive			H200, H201, H202, H203
	Explosive thermal runaway			H240
	Fatally toxic			H300, H310, H330
	Mutagenic			H350
	Repro-toxic			H360
	Serious environmental implications			H420

## Sheet: PheC2 (First Pass)
	Supplementary Information: Appendix 2				Summary of First Pass Metrics Toolkit
	Yield, AE, RME, MI/PMI and OE
	Reactant (Limiting Reactant First)	Mass (g)	MW	Mol	Catalyst	Mass (g)	Reagent	Mass (g)	Reaction solvent	Volume (cm3)	Density (g ml-1)	Mass (g)	Work up chemical	Mass (g)	Workup solvent	Volume (cm3)	Density (g ml-1)	Mass (g)
	L-Phenylalanine	10	165.19	0.0605364			SOCl2	14.41	EtOH	36.5	0.789	28.7985	Na2CO3	10	water	250	1	250
	EtOH	2.76	46.07	0.0599088								0	Na2SO4	4	ethyl acetate	150	0.894	134.1
				#DIV/0!								0						0
				#DIV/0!								0						0
				#DIV/0!								0						0
				#DIV/0!								0						0
				#DIV/0!								0						0
	Total	12.76	211.26			0		14.41				28.7985		14				384.1
										Flag
								Yield	97.0197	97.0197
								Conversion	100	100
								Selectivity	97.0197	97.0197					Mass	MW	Mol
								AE	91.475				Product		11.35	193.25	0.0587322
								RME	88.9498	OE	97.2396				mass
								PMI total	40.006				Unreacted limiting reactant		0
								PMI Reaction	4.93115
								PMI reactants, reagents, catlyst	2.39383
								PMI reaction solvents	2.53731
								PMI Workup	35.0749
								PMI Workup chemical	1.23348
								PMI workup solvents	33.8414
	Solvents (First Pass)							List solvents below
	Preferred solvents		water, EtOH, nBuOH, AcOipr, AcOnBu, PhOMe, MeOH, tBuOH, BnOH, ethylene glycol, acetone, MEK, MIBK, AcOEt, sulfolane					water, EtOH, AcOEt
	Problematic solvents: (acceptable only if substitution does not offer advantages)		DMSO, cyclohexanone, DMPU, AcOH, Ac2O, Acetonitrile, AcOMe, THF, heptane, Me-cyclohexane, toluene, xylene, MTBE, cyclohexane, chlorobenzene, formic acid, pyridine, Me-THF
	Hazardous solvents: These solvents have significant health and/or safety concerns.		dioxane, pentane, TEA, diisopropyl ether, DME, DCM, DMF, DMA, NMP, methoxyethanol, hexane
	Highly hazardous solvents: The solvents which are agreed not to be used, even in screening		Et2O, Benzene, CCl4, chloroform, DCE, nitromethane, CS2, HMPA
	Catalyst/enzyme (First Pass)				Tick						Tick
	Catalyst or enzyme used, or reaction takes place without any catalyst/reagents.			Green Flag			Facile recovery of catalyst/enzyme			Green Flag
	Use of stoichiometric quantities of reagents			Amber Flag			catalyst/enzyme not recovered			Amber Flag
	Use of reagents in excess			Red Flag	+
	Critical elements
	Supply remaining	Flag colour	Note element
	5-50 years	Red Flag
	50-500 years	Amber Flag	S
	+500 years	Green Flag
	Energy (First Pass)			Tick						Tick
	Reaction run between 0 to 70oC		Green Flag			Reaction run at reflux			Red Flag	+
	Reaction run between -20 to 0 or 70 to 140oC		Amber Flag	+		Reaction run 5oC or more below the solvent boiling point			Green Flag
	Reaction run below -20 or above 140oC		Red Flag
	Batch/flow			Tick		Work Up				List
	Flow	Green Flag				quenching			Green Flag
	Batch	Amber Flag		+		filtration
						centrifugation
						crystallisation
						Low temperature distillation/evaporation/ sublimation (< 140 oC at atmospheric pressure)
						solvent exchange, quenching into aqueous solvent			Amber Flag	quenching into aqueous solvent
						chromatography/ion exchange			Red Flag
						high temperature distillation/evaporations/sublimation (> 140 oC at atmospheric pressure)
						multiple recrystallisation
								List substances and H-codes		List substances and H-codes		List substances and H-codes
	Health & safety
		Red Flag		Amber Flag		Green Flag						L-Phenylalanine (Not a hazardous substance or mixture according to Regulation (EC) No. 1272/2008. This substance is not classified as dangerous according to Directive 67/548/EEC.)
	Highly explosive	H200, H201, H202, H203		H205, H220, H224		If no red or amber flagged H codes present then green flag						H2O (Not a hazardous substance or mixture according to Regulation (EC) No. 1272/2008. This substance is not classified as dangerous according to Directive 67/548/EEC.)
	Explosive thermal runaway	H230, H240, H250		H241								Na2CO3 (H319)
	Toxic	H300, H310, H330		H301, H311, H331,						SOCl2 (H302, H314, H331)		EtOH (H225, H319)
	Long Term toxicity	H340, H350, H360, H370, H372		H341, H351, H361, H371, H373								Ethyl acetate (H225, H319, H336)
	Environmental implications	H400, H410, H411, H420		H401, H412								Na2SO4 (Not a hazardous substance or mixture according to Regulation (EC) No. 1272/2008. This substance is not classified as dangerous according to Directive 67/548/EEC.
	Use of chemicals of environmental concern					List substances of very high concern
	Chemical identified as Substances of Very High Concern by ChemSec which are utilised				Red Flag

## Sheet: PheC4 (Zero Pass)
	Supplementary Information: Appendix 2				Summary of Zero Pass Metrics Toolkit
	Yield, conversion, selectivity, AE, RME
	Reactant (Limiting Reactant First)	Mass (g)	MW	Mol	Catalyst	Mass (g)	Reagent	Mass (g)	Reaction solvent	Volume (cm3)	Density (g ml-1)	Mass (g)	Work up chemical	Mass (g)	Workup solvent	Volume (cm3)	Density (g ml-1)	Mass (g)
	L-Phenylalanine	10	165.19	0.0605364			PTSA*H2O	13.82	PhCH3	100	0.87	87	Na2CO3	10.6	Petroleum ether	150	0.65	97.5
	n-BuOH	5.38	74.12	0.072585								0	Na2SO4	4	Water	250	1	250
				#DIV/0!								0			DCM	100	1.327	132.7
				#DIV/0!								0						0
				#DIV/0!								0						0
				#DIV/0!								0						0
				#DIV/0!								0						0
	Total	15.38	239.31			0		13.82				87		14.6				480.2
									Flag
							Yield	97.0389	97.0389
							Conversion	100	100
							Selectivity	97.0389	97.0389					mass	mw	mol
							AE	92.4742					Product	13	221.3	0.0587438
							RME	84.5254						mass
													Unreacted limiting reactant
	Solvents (Zero Pass)
	Highly hazardous solvents (Red flag for any of the following)							List Highly Hazardous Solvents Below
	Et2O, Benzene, CCl4, chloroform, DCE, nitromethane, CS2, HMPA
	Health and Safety (Zero Pass)
	Health & safety (Red flag for any of the following)						List substances plus the red flagged H-codes below
	Highly explosive			H200, H201, H202, H203
	Explosive thermal runaway			H240
	Fatally toxic			H300, H310, H330
	Mutagenic			H350
	Repro-toxic			H360
	Serious environmental implications			H420

## Sheet: PheC4 (First Pass)
	Supplementary Information: Appendix 2				Summary of First Pass Metrics Toolkit
	Yield, AE, RME, MI/PMI and OE
	Reactant (Limiting Reactant First)	Mass (g)	MW	Mol	Catalyst	Mass (g)	Reagent	Mass (g)	Reaction solvent	Volume (cm3)	Density (g ml-1)	Mass (g)	Work up chemical	Mass (g)	Workup solvent	Volume (cm3)	Density (g ml-1)	Mass (g)
	L-Phenylalanine	10	165.19	0.0605364			PTSA*H2O	13.82	PhCH3	100	0.87	87	Na2CO3	10.6	Petroleum ether	150	0.65	97.5
	n-BuOH	5.38	74.12	0.072585								0	Na2SO4	4	Water	250	1	250
				#DIV/0!								0			DCM	100	1.327	132.7
				#DIV/0!								0						0
				#DIV/0!								0						0
				#DIV/0!								0						0
				#DIV/0!								0						0
	Total	15.38	239.31			0		13.82				87		14.6				480.2
										Flag
								Yield	97.0389	97.0389
								Conversion	100	100
								Selectivity	97.0389	97.0389					Mass	MW	Mol
								AE	92.4742				Product		13	221.3	0.0587438
								RME	84.5254	OE	91.4043				mass
								PMI total	47				Unreacted limiting reactant		0
								PMI Reaction	8.93846
								PMI reactants, reagents, catlyst	2.24615
								PMI reaction solvents	6.69231
								PMI Workup	38.0615
								PMI Workup chemical	1.12308
								PMI workup solvents	36.9385
	Solvents (First Pass)							List solvents below
	Preferred solvents		water, EtOH, nBuOH, AcOipr, AcOnBu, PhOMe, MeOH, tBuOH, BnOH, ethylene glycol, acetone, MEK, MIBK, AcOEt, sulfolane					Water
	Problematic solvents: (acceptable only if substitution does not offer advantages)		DMSO, cyclohexanone, DMPU, AcOH, Ac2O, Acetonitrile, AcOMe, THF, heptane, Me-cyclohexane, toluene, xylene, MTBE, cyclohexane, chlorobenzene, formic acid, pyridine, Me-THF					Toluene
	Hazardous solvents: These solvents have significant health and/or safety concerns.		dioxane, pentane, TEA, diisopropyl ether, DME, DCM, DMF, DMA, NMP, methoxyethanol, hexane					Petroleum ether, DCM
	Highly hazardous solvents: The solvents which are agreed not to be used, even in screening		Et2O, Benzene, CCl4, chloroform, DCE, nitromethane, CS2, HMPA
	Catalyst/enzyme (First Pass)				Tick						Tick
	Catalyst or enzyme used, or reaction takes place without any catalyst/reagents.			Green Flag			Facile recovery of catalyst/enzyme			Green Flag
	Use of stoichiometric quantities of reagents			Amber Flag			catalyst/enzyme not recovered			Amber Flag
	Use of reagents in excess			Red Flag	+
	Critical elements
	Supply remaining	Flag colour	Note element
	5-50 years	Red Flag
	50-500 years	Amber Flag	S
	+500 years	Green Flag
	Energy (First Pass)			Tick						Tick
	Reaction run between 0 to 70oC		Green Flag			Reaction run at reflux			Red Flag	+
	Reaction run between -20 to 0 or 70 to 140oC		Amber Flag	+		Reaction run 5oC or more below the solvent boiling point			Green Flag
	Reaction run below -20 or above 140oC		Red Flag
	Batch/flow			Tick		Work Up				List
	Flow	Green Flag				quenching			Green Flag
	Batch	Amber Flag		+		filtration
						centrifugation
						crystallisation
						Low temperature distillation/evaporation/ sublimation (< 140 oC at atmospheric pressure)
						solvent exchange, quenching into aqueous solvent			Amber Flag	quenching into aqueous solvent
						chromatography/ion exchange			Red Flag
						high temperature distillation/evaporations/sublimation (> 140 oC at atmospheric pressure)
						multiple recrystallisation
								List substances and H-codes		List substances and H-codes		List substances and H-codes
	Health & safety
		Red Flag		Amber Flag		Green Flag						L-Phenylalanine (Not a hazardous substance or mixture according to Regulation (EC) No. 1272/2008. This substance is not classified as dangerous according to Directive 67/548/EEC.)
	Highly explosive	H200, H201, H202, H203		H205, H220, H224		If no red or amber flagged H codes present then green flag						H2O (Not a hazardous substance or mixture according to Regulation (EC) No. 1272/2008. This substance is not classified as dangerous according to Directive 67/548/EEC.)
	Explosive thermal runaway	H230, H240, H250		H241								Na2CO3 (H319)
	Toxic	H300, H310, H330		H301, H311, H331,								n-BuOH (H226, H302, H315, H318, H335, H336)
	Long Term toxicity	H340, H350, H360, H370, H372		H341, H351, H361, H371, H373						DCM (H351, H373); Toluene (H361, H373); Petroleum ether (H361, H373)		Na2SO4 (Not a hazardous substance or mixture according to Regulation (EC) No. 1272/2008. This substance is not classified as dangerous according to Directive 67/548/EEC.
	Environmental implications	H400, H410, H411, H420		H401, H412				Petroleum ether (H411)				PTSA*H2O (H290, H314, H335)
	Use of chemicals of environmental concern					List substances of very high concern
	Chemical identified as Substances of Very High Concern by ChemSec which are utilised				Red Flag

## Sheet: PheC6 (Zero Pass)
	Supplementary Information: Appendix 2				Summary of Zero Pass Metrics Toolkit
	Yield, conversion, selectivity, AE, RME
	Reactant (Limiting Reactant First)	Mass (g)	MW	Mol	Catalyst	Mass (g)	Reagent	Mass (g)	Reaction solvent	Volume (cm3)	Density (g ml-1)	Mass (g)	Work up chemical	Mass (g)	Workup solvent	Volume (cm3)	Density (g ml-1)	Mass (g)
	L-Phenylalanine	10	165.19	0.0605364			PTSA*H2O	13.82	PhCH3	100	0.87	87	Na2CO3	10.6	Petroleum ether	150	0.65	97.5
	n-HexOH	7.42	102.17	0.0726241								0	Na2SO4	4	Water	250	1	250
				#DIV/0!								0			DCM	100	1.327	132.7
				#DIV/0!								0						0
				#DIV/0!								0						0
				#DIV/0!								0						0
				#DIV/0!								0						0
	Total	17.42	267.36			0		13.82				87		14.6				480.2
									Flag
							Yield	98.0474	98.0474
							Conversion	100	100
							Selectivity	98.0474	98.0474					mass	mw	mol
							AE	93.2638					Product	14.8	249.35	0.0593543
							RME	84.9598						mass
													Unreacted limiting reactant
	Solvents (Zero Pass)
	Highly hazardous solvents (Red flag for any of the following)							List Highly Hazardous Solvents Below
	Et2O, Benzene, CCl4, chloroform, DCE, nitromethane, CS2, HMPA
	Health and Safety (Zero Pass)
	Health & safety (Red flag for any of the following)						List substances plus the red flagged H-codes below
	Highly explosive			H200, H201, H202, H203
	Explosive thermal runaway			H240
	Fatally toxic			H300, H310, H330
	Mutagenic			H350
	Repro-toxic			H360
	Serious environmental implications			H420

## Sheet: PheC6 (First Pass)
	Supplementary Information: Appendix 2				Summary of First Pass Metrics Toolkit
	Yield, AE, RME, MI/PMI and OE
	Reactant (Limiting Reactant First)	Mass (g)	MW	Mol	Catalyst	Mass (g)	Reagent	Mass (g)	Reaction solvent	Volume (cm3)	Density (g ml-1)	Mass (g)	Work up chemical	Mass (g)	Workup solvent	Volume (cm3)	Density (g ml-1)	Mass (g)
	L-Phenylalanine	10	165.19	0.0605364			PTSA*H2O	13.82	PhCH3	100	0.87	87	Na2CO3	10.6	Petroleum ether	150	0.65	97.5
	n-HexOH	7.42	102.17	0.0726241								0	Na2SO4	4	Water	250	1	250
				#DIV/0!								0			DCM	100	1.327	132.7
				#DIV/0!								0						0
				#DIV/0!								0						0
				#DIV/0!								0						0
				#DIV/0!								0						0
	Total	17.42	267.36			0		13.82				87		14.6				480.2
										Flag
								Yield	98.0474	98.0474
								Conversion	100	100
								Selectivity	98.0474	98.0474					Mass	MW	Mol
								AE	93.2638				Product		14.8	249.35	0.0593543
								RME	84.9598	OE	91.0963				mass
								PMI total	41.4216				Unreacted limiting reactant		0
								PMI Reaction	7.98919
								PMI reactants, reagents, catlyst	2.11081
								PMI reaction solvents	5.87838
								PMI Workup	33.4324
								PMI Workup chemical	0.986486
								PMI workup solvents	32.4459
	Solvents (First Pass)							List solvents below
	Preferred solvents		water, EtOH, nBuOH, AcOipr, AcOnBu, PhOMe, MeOH, tBuOH, BnOH, ethylene glycol, acetone, MEK, MIBK, AcOEt, sulfolane					Water
	Problematic solvents: (acceptable only if substitution does not offer advantages)		DMSO, cyclohexanone, DMPU, AcOH, Ac2O, Acetonitrile, AcOMe, THF, heptane, Me-cyclohexane, toluene, xylene, MTBE, cyclohexane, chlorobenzene, formic acid, pyridine, Me-THF					Toluene
	Hazardous solvents: These solvents have significant health and/or safety concerns.		dioxane, pentane, TEA, diisopropyl ether, DME, DCM, DMF, DMA, NMP, methoxyethanol, hexane					Petroleum ether, DCM
	Highly hazardous solvents: The solvents which are agreed not to be used, even in screening		Et2O, Benzene, CCl4, chloroform, DCE, nitromethane, CS2, HMPA
	Catalyst/enzyme (First Pass)				Tick						Tick
	Catalyst or enzyme used, or reaction takes place without any catalyst/reagents.			Green Flag			Facile recovery of catalyst/enzyme			Green Flag
	Use of stoichiometric quantities of reagents			Amber Flag			catalyst/enzyme not recovered			Amber Flag
	Use of reagents in excess			Red Flag	+
	Critical elements
	Supply remaining	Flag colour	Note element
	5-50 years	Red Flag
	50-500 years	Amber Flag	S
	+500 years	Green Flag
	Energy (First Pass)			Tick						Tick
	Reaction run between 0 to 70oC		Green Flag			Reaction run at reflux			Red Flag	+
	Reaction run between -20 to 0 or 70 to 140oC		Amber Flag	+		Reaction run 5oC or more below the solvent boiling point			Green Flag
	Reaction run below -20 or above 140oC		Red Flag
	Batch/flow			Tick		Work Up				List
	Flow	Green Flag				quenching			Green Flag
	Batch	Amber Flag		+		filtration
						centrifugation
						crystallisation
						Low temperature distillation/evaporation/ sublimation (< 140 oC at atmospheric pressure)
						solvent exchange, quenching into aqueous solvent			Amber Flag	quenching into aqueous solvent
						chromatography/ion exchange			Red Flag
						high temperature distillation/evaporations/sublimation (> 140 oC at atmospheric pressure)
						multiple recrystallisation
								List substances and H-codes		List substances and H-codes		List substances and H-codes
	Health & safety
		Red Flag		Amber Flag		Green Flag						L-Phenylalanine (Not a hazardous substance or mixture according to Regulation (EC) No. 1272/2008. This substance is not classified as dangerous according to Directive 67/548/EEC.)
	Highly explosive	H200, H201, H202, H203		H205, H220, H224		If no red or amber flagged H codes present then green flag						H2O (Not a hazardous substance or mixture according to Regulation (EC) No. 1272/2008. This substance is not classified as dangerous according to Directive 67/548/EEC.)
	Explosive thermal runaway	H230, H240, H250		H241								Na2CO3 (H319)
	Toxic	H300, H310, H330		H301, H311, H331,								n-HexOH (H226, H302, H312, H319)
	Long Term toxicity	H340, H350, H360, H370, H372		H341, H351, H361, H371, H373						DCM (H351, H373); Toluene (H361, H373); Petroleum ether (H361, H373)		Na2SO4 (Not a hazardous substance or mixture according to Regulation (EC) No. 1272/2008. This substance is not classified as dangerous according to Directive 67/548/EEC.
	Environmental implications	H400, H410, H411, H420		H401, H412				Petroleum ether (H411)				PTSA*H2O (H290, H314, H335)
	Use of chemicals of environmental concern					List substances of very high concern
	Chemical identified as Substances of Very High Concern by ChemSec which are utilised				Red Flag

## Sheet: PheC8 (Zero Pass)
	Supplementary Information: Appendix 2				Summary of Zero Pass Metrics Toolkit
	Yield, conversion, selectivity, AE, RME
	Reactant (Limiting Reactant First)	Mass (g)	MW	Mol	Catalyst	Mass (g)	Reagent	Mass (g)	Reaction solvent	Volume (cm3)	Density (g ml-1)	Mass (g)	Work up chemical	Mass (g)	Workup solvent	Volume (cm3)	Density (g ml-1)	Mass (g)
	L-Phenylalanine	10	165.19	0.0605364			PTSA*H2O	13.82	PhCH3	100	0.87	87	Na2CO3	10.6	Petroleum ether	150	0.65	97.5
	n-OctOH	9.46	130.23	0.0726407								0	Na2SO4	4	Water	250	1	250
				#DIV/0!								0			DCM	100	1.327	132.7
				#DIV/0!								0						0
				#DIV/0!								0						0
				#DIV/0!								0						0
				#DIV/0!								0						0
	Total	19.46	295.42			0		13.82				87		14.6				480.2
									Flag
							Yield	97.9552	97.9552
							Conversion	100	100
							Selectivity	97.9552	97.9552					mass	mw	mol
							AE	93.9036					Product	16.45	277.41	0.0592985
							RME	84.5324						mass
													Unreacted limiting reactant
	Solvents (Zero Pass)
	Highly hazardous solvents (Red flag for any of the following)							List Highly Hazardous Solvents Below
	Et2O, Benzene, CCl4, chloroform, DCE, nitromethane, CS2, HMPA
	Health and Safety (Zero Pass)
	Health & safety (Red flag for any of the following)						List substances plus the red flagged H-codes below
	Highly explosive			H200, H201, H202, H203
	Explosive thermal runaway			H240
	Fatally toxic			H300, H310, H330
	Mutagenic			H350
	Repro-toxic			H360
	Serious environmental implications			H420

## Sheet: PheC8 (First Pass)
	Supplementary Information: Appendix 2				Summary of First Pass Metrics Toolkit
	Yield, AE, RME, MI/PMI and OE
	Reactant (Limiting Reactant First)	Mass (g)	MW	Mol	Catalyst	Mass (g)	Reagent	Mass (g)	Reaction solvent	Volume (cm3)	Density (g ml-1)	Mass (g)	Work up chemical	Mass (g)	Workup solvent	Volume (cm3)	Density (g ml-1)	Mass (g)
	L-Phenylalanine	10	165.19	0.0605364			PTSA*H2O	13.82	PhCH3	100	0.87	87	Na2CO3	10.6	Petroleum ether	150	0.65	97.5
	n-OctOH	9.46	130.23	0.0726407								0	Na2SO4	4	Water	250	1	250
				#DIV/0!								0			DCM	100	1.327	132.7
				#DIV/0!								0						0
				#DIV/0!								0						0
				#DIV/0!								0						0
				#DIV/0!								0						0
	Total	19.46	295.42			0		13.82				87		14.6				480.2
										Flag
								Yield	97.9552	97.9552
								Conversion	100	100
								Selectivity	97.9552	97.9552					Mass	MW	Mol
								AE	93.9036				Product		16.45	277.41	0.0592985
								RME	84.5324	OE	90.0204				mass
								PMI total	37.3909				Unreacted limiting reactant		0
								PMI Reaction	7.31185
								PMI reactants, reagents, catlyst	2.0231
								PMI reaction solvents	5.28875
								PMI Workup	30.079
								PMI Workup chemical	0.887538
								PMI workup solvents	29.1915
	Solvents (First Pass)							List solvents below
	Preferred solvents		water, EtOH, nBuOH, AcOipr, AcOnBu, PhOMe, MeOH, tBuOH, BnOH, ethylene glycol, acetone, MEK, MIBK, AcOEt, sulfolane					Water
	Problematic solvents: (acceptable only if substitution does not offer advantages)		DMSO, cyclohexanone, DMPU, AcOH, Ac2O, Acetonitrile, AcOMe, THF, heptane, Me-cyclohexane, toluene, xylene, MTBE, cyclohexane, chlorobenzene, formic acid, pyridine, Me-THF					Toluene
	Hazardous solvents: These solvents have significant health and/or safety concerns.		dioxane, pentane, TEA, diisopropyl ether, DME, DCM, DMF, DMA, NMP, methoxyethanol, hexane					Petroleum ether, DCM
	Highly hazardous solvents: The solvents which are agreed not to be used, even in screening		Et2O, Benzene, CCl4, chloroform, DCE, nitromethane, CS2, HMPA
	Catalyst/enzyme (First Pass)				Tick						Tick
	Catalyst or enzyme used, or reaction takes place without any catalyst/reagents.			Green Flag			Facile recovery of catalyst/enzyme			Green Flag
	Use of stoichiometric quantities of reagents			Amber Flag			catalyst/enzyme not recovered			Amber Flag
	Use of reagents in excess			Red Flag	+
	Critical elements
	Supply remaining	Flag colour	Note element
	5-50 years	Red Flag
	50-500 years	Amber Flag	S
	+500 years	Green Flag
	Energy (First Pass)			Tick						Tick
	Reaction run between 0 to 70oC		Green Flag			Reaction run at reflux			Red Flag	+
	Reaction run between -20 to 0 or 70 to 140oC		Amber Flag	+		Reaction run 5oC or more below the solvent boiling point			Green Flag
	Reaction run below -20 or above 140oC		Red Flag
	Batch/flow			Tick		Work Up				List
	Flow	Green Flag				quenching			Green Flag
	Batch	Amber Flag		+		filtration
						centrifugation
						crystallisation
						Low temperature distillation/evaporation/ sublimation (< 140 oC at atmospheric pressure)
						solvent exchange, quenching into aqueous solvent			Amber Flag	quenching into aqueous solvent
						chromatography/ion exchange			Red Flag
						high temperature distillation/evaporations/sublimation (> 140 oC at atmospheric pressure)
						multiple recrystallisation
								List substances and H-codes		List substances and H-codes		List substances and H-codes
	Health & safety
		Red Flag		Amber Flag		Green Flag						L-Phenylalanine (Not a hazardous substance or mixture according to Regulation (EC) No. 1272/2008. This substance is not classified as dangerous according to Directive 67/548/EEC.)
	Highly explosive	H200, H201, H202, H203		H205, H220, H224		If no red or amber flagged H codes present then green flag						H2O (Not a hazardous substance or mixture according to Regulation (EC) No. 1272/2008. This substance is not classified as dangerous according to Directive 67/548/EEC.)
	Explosive thermal runaway	H230, H240, H250		H241								Na2CO3 (H319)
	Toxic	H300, H310, H330		H301, H311, H331,								Na2SO4 (Not a hazardous substance or mixture according to Regulation (EC) No. 1272/2008. This substance is not classified as dangerous according to Directive 67/548/EEC.
	Long Term toxicity	H340, H350, H360, H370, H372		H341, H351, H361, H371, H373						DCM (H351, H373); Toluene (H361, H373); Petroleum ether (H361, H373)		PTSA*H2O (H290, H314, H335)
	Environmental implications	H400, H410, H411, H420		H401, H412				Petroleum ether (H411)		n-OctOH (H319, H412)
	Use of chemicals of environmental concern					List substances of very high concern
	Chemical identified as Substances of Very High Concern by ChemSec which are utilised				Red Flag

## Sheet: PheC10 (Zero Pass)
	Supplementary Information: Appendix 2				Summary of Zero Pass Metrics Toolkit
	Yield, conversion, selectivity, AE, RME
	Reactant (Limiting Reactant First)	Mass (g)	MW	Mol	Catalyst	Mass (g)	Reagent	Mass (g)	Reaction solvent	Volume (cm3)	Density (g ml-1)	Mass (g)	Work up chemical	Mass (g)	Workup solvent	Volume (cm3)	Density (g ml-1)	Mass (g)
	L-Phenylalanine	10	165.19	0.0605364			PTSA*H2O	13.82	PhCH3	100	0.87	87	Na2CO3	10.6	Petroleum ether	150	0.65	97.5
	n-DecOH	11.5	158.28	0.0726561								0	Na2SO4	4	Water	250	1	250
				#DIV/0!								0			DCM	100	1.327	132.7
				#DIV/0!								0						0
				#DIV/0!								0						0
				#DIV/0!								0						0
				#DIV/0!								0						0
	Total	21.5	323.47			0		13.82				87		14.6				480.2
									Flag
							Yield	98.9647	98.9647
							Conversion	100	100
							Selectivity	98.9647	98.9647					mass	mw	mol
							AE	94.4323					Product	18.3	305.46	0.0599096
							RME	85.1163						mass
													Unreacted limiting reactant
	Solvents (Zero Pass)
	Highly hazardous solvents (Red flag for any of the following)							List Highly Hazardous Solvents Below
	Et2O, Benzene, CCl4, chloroform, DCE, nitromethane, CS2, HMPA
	Health and Safety (Zero Pass)
	Health & safety (Red flag for any of the following)						List substances plus the red flagged H-codes below
	Highly explosive			H200, H201, H202, H203
	Explosive thermal runaway			H240
	Fatally toxic			H300, H310, H330
	Mutagenic			H350
	Repro-toxic			H360
	Serious environmental implications			H420

## Sheet: PheC10 (First Pass)
	Supplementary Information: Appendix 2				Summary of First Pass Metrics Toolkit
	Yield, AE, RME, MI/PMI and OE
	Reactant (Limiting Reactant First)	Mass (g)	MW	Mol	Catalyst	Mass (g)	Reagent	Mass (g)	Reaction solvent	Volume (cm3)	Density (g ml-1)	Mass (g)	Work up chemical	Mass (g)	Workup solvent	Volume (cm3)	Density (g ml-1)	Mass (g)
	L-Phenylalanine	10	165.19	0.0605364			PTSA*H2O	13.82	PhCH3	100	0.87	87	Na2CO3	10.6	Petroleum ether	150	0.65	97.5
	n-DecOH	11.5	158.28	0.0726561								0	Na2SO4	4	Water	250	1	250
				#DIV/0!								0			DCM	100	1.327	132.7
				#DIV/0!								0						0
				#DIV/0!								0						0
				#DIV/0!								0						0
				#DIV/0!								0						0
	Total	21.5	323.47			0		13.82				87		14.6				480.2
										Flag
								Yield	98.9647	98.9647
								Conversion	100	100
								Selectivity	98.9647	98.9647					Mass	MW	Mol
								AE	94.4323				Product		18.3	305.46	0.0599096
								RME	85.1163	OE	90.1348				mass
								PMI total	33.7224				Unreacted limiting reactant		0
								PMI Reaction	6.68415
								PMI reactants, reagents, catlyst	1.93005
								PMI reaction solvents	4.7541
								PMI Workup	27.0383
								PMI Workup chemical	0.797814
								PMI workup solvents	26.2404
	Solvents (First Pass)							List solvents below
	Preferred solvents		water, EtOH, nBuOH, AcOipr, AcOnBu, PhOMe, MeOH, tBuOH, BnOH, ethylene glycol, acetone, MEK, MIBK, AcOEt, sulfolane					Water
	Problematic solvents: (acceptable only if substitution does not offer advantages)		DMSO, cyclohexanone, DMPU, AcOH, Ac2O, Acetonitrile, AcOMe, THF, heptane, Me-cyclohexane, toluene, xylene, MTBE, cyclohexane, chlorobenzene, formic acid, pyridine, Me-THF					Toluene
	Hazardous solvents: These solvents have significant health and/or safety concerns.		dioxane, pentane, TEA, diisopropyl ether, DME, DCM, DMF, DMA, NMP, methoxyethanol, hexane					Petroleum ether, DCM
	Highly hazardous solvents: The solvents which are agreed not to be used, even in screening		Et2O, Benzene, CCl4, chloroform, DCE, nitromethane, CS2, HMPA
	Catalyst/enzyme (First Pass)				Tick						Tick
	Catalyst or enzyme used, or reaction takes place without any catalyst/reagents.			Green Flag			Facile recovery of catalyst/enzyme			Green Flag
	Use of stoichiometric quantities of reagents			Amber Flag			catalyst/enzyme not recovered			Amber Flag
	Use of reagents in excess			Red Flag	+
	Critical elements
	Supply remaining	Flag colour	Note element
	5-50 years	Red Flag
	50-500 years	Amber Flag	S
	+500 years	Green Flag
	Energy (First Pass)			Tick						Tick
	Reaction run between 0 to 70oC		Green Flag			Reaction run at reflux			Red Flag	+
	Reaction run between -20 to 0 or 70 to 140oC		Amber Flag	+		Reaction run 5oC or more below the solvent boiling point			Green Flag
	Reaction run below -20 or above 140oC		Red Flag
	Batch/flow			Tick		Work Up				List
	Flow	Green Flag				quenching			Green Flag
	Batch	Amber Flag		+		filtration
						centrifugation
						crystallisation
						Low temperature distillation/evaporation/ sublimation (< 140 oC at atmospheric pressure)
						solvent exchange, quenching into aqueous solvent			Amber Flag	quenching into aqueous solvent
						chromatography/ion exchange			Red Flag
						high temperature distillation/evaporations/sublimation (> 140 oC at atmospheric pressure)
						multiple recrystallisation
								List substances and H-codes		List substances and H-codes		List substances and H-codes
	Health & safety
		Red Flag		Amber Flag		Green Flag						L-Phenylalanine (Not a hazardous substance or mixture according to Regulation (EC) No. 1272/2008. This substance is not classified as dangerous according to Directive 67/548/EEC.)
	Highly explosive	H200, H201, H202, H203		H205, H220, H224		If no red or amber flagged H codes present then green flag						H2O (Not a hazardous substance or mixture according to Regulation (EC) No. 1272/2008. This substance is not classified as dangerous according to Directive 67/548/EEC.)
	Explosive thermal runaway	H230, H240, H250		H241								Na2CO3 (H319)
	Toxic	H300, H310, H330		H301, H311, H331,								Na2SO4 (Not a hazardous substance or mixture according to Regulation (EC) No. 1272/2008. This substance is not classified as dangerous according to Directive 67/548/EEC.
	Long Term toxicity	H340, H350, H360, H370, H372		H341, H351, H361, H371, H373						DCM (H351, H373); Toluene (H361, H373); Petroleum ether (H361, H373)		PTSA*H2O (H290, H314, H335)
	Environmental implications	H400, H410, H411, H420		H401, H412				Petroleum ether (H411)		n-DecOH (H319, H412)
	Use of chemicals of environmental concern					List substances of very high concern
	Chemical identified as Substances of Very High Concern by ChemSec which are utilised				Red Flag

[truncated: 6 more sheets: PheC12 (Zero Pass), PheC12 (First Pass), PheC14 (Zero Pass), PheC14 (First Pass), PheC16 (Zero Pass), PheC16 (First Pass)]
